# Supplementary material
Source: PubMed Central journal article supplement (PMC5780192)
Supplement: NIHMS901673-supplement-supplement_1.pdf [file NIHMS901673-supplement-supplement_1.pdf]

## SLEEP DISTURBANCE IN ADT RECIPIENTS

Supplementary Table 1

*Control Groups Did Not Differ on Sleep Outcomes, Nocturia, or Hot Flash Interference*

| Outcome                      | Sample Size | ADT-                   | CA-                    | ADT- vs. CA- |
|------------------------------|-------------|------------------------|------------------------|--------------|
|                              | n           | <i>M</i> ( <i>SD</i> ) | <i>M</i> ( <i>SD</i> ) | <i>p</i>     |
| Sleep Efficiency             | 68          | 80.56 (7.92)           | 78.98 (8.16)           | .42          |
| Wake After Sleep Onset       | 68          | 55.00 (23.68)          | 52.91 (19.92)          | .70          |
| Sleep Onset Latency          | 68          | 20.04 (28.24)          | 26.25 (27.92)          | .37          |
| Sleep Duration               | 68          | 436.76 (64.35)         | 431.74 (73.71)         | .77          |
| Nocturia                     | 68          | 1.41 (0.99)            | 1.49 (1.25)            | .78          |
| Outcome                      | n           | <i>M</i> ( <i>SE</i> ) | <i>M</i> ( <i>SE</i> ) | <i>p</i>     |
| Subjective Sleep Disturbance | 207         | 5.33 (0.43)            | 5.13 (0.47)            | .76          |
| Hot Flash Interference       | 207         | 0.93 (0.40)            | 0.36 (0.18)            | .18          |

*Note.* ADT- = prostate cancer patients not treated with ADT; CA- = men with no history of prostate cancer; *M* = mean; *SD* = standard deviation; *SE* = standard error.

## SLEEP DISTURBANCE IN ADT RECIPIENTS

Supplementary Table 2

*Unadjusted Group Means for Sleep Outcomes, Nocturia, and Hot Flash Interference*

|                              | Sample Size | ADT+           | Controls       |
|------------------------------|-------------|----------------|----------------|
|                              | n           | <i>M (SD)</i>  | <i>M (SD)</i>  |
| Sleep Efficiency             | 100         | 75.07 (13.26)  | 79.82 (8.00)   |
| Wake After Sleep Onset       | 100         | 73.49 (34.19)  | 54.01 (21.85)  |
| Sleep Onset Latency          | 100         | 32.89 (47.24)  | 22.96 (26.05)  |
| Sleep Duration               | 100         | 447.54 (98.59) | 434.40 (68.43) |
| Nocturia                     | 99          | 3.33 (2.15)    | 1.45 (1.12)    |
| Subjective Sleep Disturbance | 226         | 9.84 (7.45)    | 5.25 (5.02)    |
| Hot Flash Interference       | 224         | 14.91 (20.16)  | 0.41 (3.16)    |

*Note.* ADT+ = prostate cancer patients treated with ADT; SD = standard deviation. Covariate-adjusted *p* values controlling for baseline medical comorbidities were calculated using ANCOVA analyses.
